# Supplementary material for: High-Performance Perovskite Solar Cells and Modules Fabricated by Slot-Die Coating with Nontoxic Solvents
Source: MDPI journal article supplement (doi:10.3390/nano13111760), 2023-05-29
Supplement: s1 [file s1]

Supporting information

High-Performance Perovskite Solar Cells and Modules  
Fabricated by Slot-Die Coating with Nontoxic  
Solvents

Chia-Feng Li<sup>1,2</sup>, Hung-Chue Huang<sup>1</sup>, Shih-Han Huang<sup>2</sup>, Yu-Hung Hsiao<sup>2</sup>, Priyanka Chaudhary<sup>2</sup>,  
Chun-Yu Chang<sup>2</sup>, Feng-Yu Tsai<sup>1</sup>, Wei-Fang Su<sup>1,2</sup> and Yu-Ching Huang<sup>2,4,5,\*</sup>

<sup>1</sup> Department of Materials Science and Engineering, National Taiwan University, Taipei 10617, Taiwan; d10527005@ntu.edu.tw (C.-F.L.); r06527061@ntu.edu.tw (H.-C.H.); ftsai@ntu.edu.tw (F.-Y.T.); suwf@ntu.edu.tw (W.-F.S.)  
<sup>2</sup> Department of Materials Engineering, Ming Chi University of Technology, New Taipei City 24301, Taiwan; d05527006@ntu.edu.tw (S.-H.H.); u08187148@mail2.mcut.edu.tw (Y.-H.H.); priyanka@mail.mcut.edu.tw (P.C.)  
<sup>3</sup> Sumei Chemical Co., Ltd., Tao-Yuan City 32849, Taiwan; october32019@gmail.com (C.-Y.C.)  
<sup>4</sup> Organic Electronics Research Center, Ming Chi University of Technology, New Taipei City 24301, Taiwan  
<sup>5</sup> Center for Plasma and Thin Film Technologies, Ming Chi University of Technology, New Taipei City 24301, Taiwan  
<sup>\*</sup> Correspondence: huangyc@mail.mcut.edu.tw; Tel.: +886 2 2908 9899 (ext. 4477)

**Table S1.** The thickness, resistance (R) and device performance of slot-die coated PSCs with different precursor concentration of NiO<sub>x</sub> film compared with spin coated PSCs.

| Process       | Precursor concentration (M) | Thickness (nm) | R (10 <sup>-1</sup> ohm) | V <sub>oc</sub> (V) | J <sub>sc</sub> (mA/cm <sup>2</sup> ) | FF (%)      | PCE (%)     |
|---------------|-----------------------------|----------------|--------------------------|---------------------|---------------------------------------|-------------|-------------|
| Slot-die (SD) | 0.125                       | 22.52 ±3.03    | 8.04                     | 0.98 ±0.07          | 20.30±0.71                            | 60.74 ±8.78 | 12.26 ±2.23 |
|               |                             |                |                          | (1.01)              | (19.46)                               | (66.22)     | (13.12)     |
|               |                             |                |                          |                     |                                       |             |             |
|               | 0.25                        | 60.37 ±6.84    | 12.44                    | 1.05 ±0.01          | 18.52 ±0.52                           | 73.24 ±3.12 | 14.30 ±0.81 |
|               |                             |                |                          | (1.05)              | (18.80)                               | (77.53)     | (15.43)     |
|               |                             |                |                          |                     |                                       |             |             |
|               | 0.375                       | 69.12±7.76     | 14.65                    | 1.05 ±0.00          | 17.78 ±0.38                           | 71.84 ±3.98 | 13.47 ±0.77 |
|               |                             |                |                          | (1.06)              | (17.45)                               | (77.17)     | (14.30)     |
|               |                             |                |                          |                     |                                       |             |             |
|               | 0.50                        | 86.88±8.15     | 19.05                    | 1.05 ±0.01          | 16.41 ±0.80                           | 71.78 ±4.41 | 12.47 ±1.07 |
|               |                             |                |                          | (1.06)              | (17.06)                               | (74.85)     | (13.57)     |
|               |                             |                |                          |                     |                                       |             |             |

Formatted: Font: Not Bold

|      |      |             |       |            |             |             |             |
|------|------|-------------|-------|------------|-------------|-------------|-------------|
| Spin | 0.50 | 61.30 ±6.59 | 12.64 | 1.05 ±0.01 | 18.31 ±0.72 | 73.98 ±2.33 | 14.28 ±0.52 |
| (SP) |      |             |       | (1.08)     | (19.06)     | (74.46)     | (15.41)     |

- Formatted: Font: Not Bold

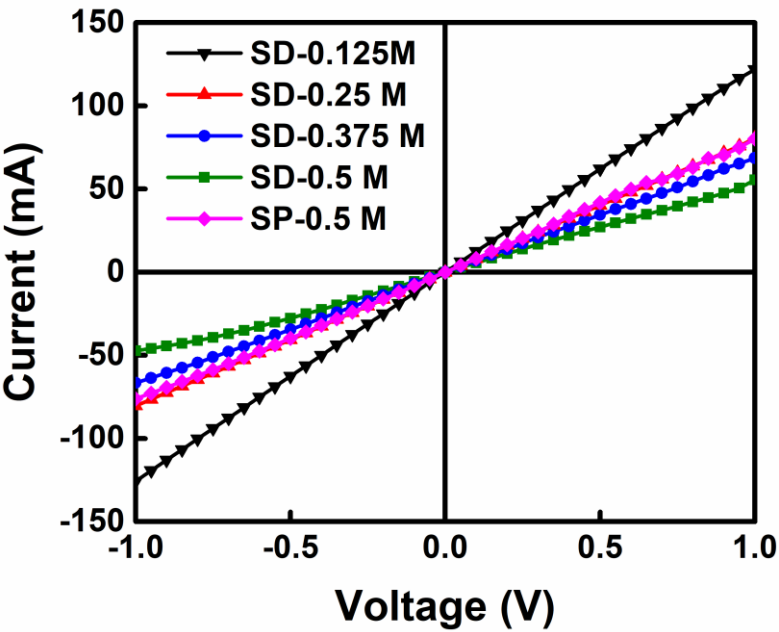

**Figure S1.** The I–V curve of slot-die coated NiO<sub>x</sub> film with precursor concentration and spin coated NiO<sub>x</sub>–NiO<sub>x</sub> film obtained by linear sweep voltammetry.

- Formatted: Subscript
- Formatted: Subscript

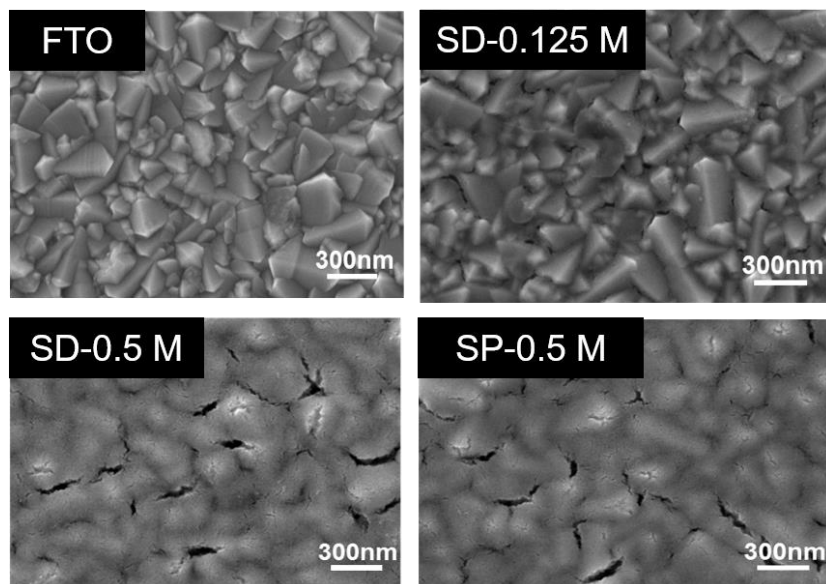

**Figure S2.** Top view SEM image of FTO, 0.125 M and 0.25 M nm NiO<sub>x</sub> film by slot-die, 0.5 M NiO<sub>x</sub> film by spin coating.

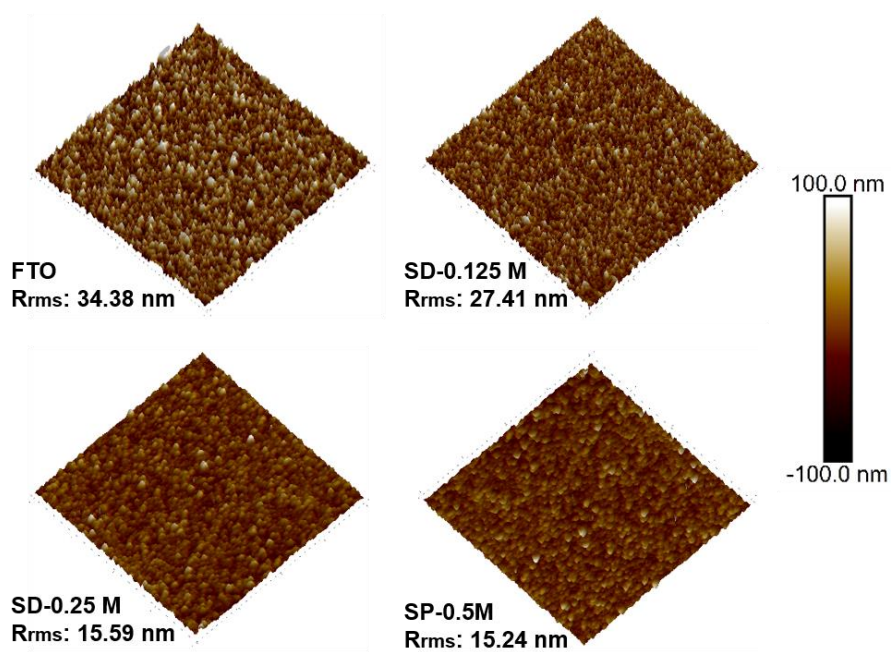

**Figure S3.** AFM image of FTO, 0.125 M and 0.25 M NiO<sub>x</sub> film by slot-die, 0.5 M NiO<sub>x</sub> film by spin coating.

**Table S2.** Physical properties of solvents.

| Solvent   | Vapor pressure at R.T.<br>(Pa) | Surface<br>tension<br>(mN m <sup>-1</sup> ) | Boiling<br>point<br>(°C) |
|-----------|--------------------------------|---------------------------------------------|--------------------------|
| DMF       | 516                            | 33.78                                       | 152                      |
| DMSO      | 56                             | 37.81                                       | 189                      |
| 2-MP      | 1292                           | 26.23                                       | 135                      |
| DMSO+2-MP | -                              | 29.65                                       | -                        |

**Table S3.** Fitting results of time-resolved photoluminescence characterization.

| Solvent             | $\tau_1$<br>(ns) | Fraction<br>(%) | $\tau_2$<br>(ns) | Fraction<br>(%) | $\tau_{\text{average}}$<br>(ns) |
|---------------------|------------------|-----------------|------------------|-----------------|---------------------------------|
| DMSO                | 21.54            | 75              | 2.27             | 25              | 16.73                           |
| DMSO:2-MP (30 vol%) | 36.59            | 88              | 3.72             | 12              | 32.64                           |

**Table S4.** Device performance of different thickness of perovskite film by slot-die coating.

| Thickness<br>(nm) | V <sub>oc</sub><br>(V) | J <sub>sc</sub><br>(mA/cm <sup>2</sup> ) | FF<br>(%)              | PCE<br>(%)            |
|-------------------|------------------------|------------------------------------------|------------------------|-----------------------|
| 218.47±29.21      | 1.03 ±0.02<br>(1.05)   | 14.26 ±1.87<br>(14.86)                   | 67.16 ±5.32<br>(72.79) | 9.86 ±1.76<br>(11.44) |

Formatted: Font: Not Bold

Formatted: Font: Not Bold

Formatted: Font: Not Bold

Formatted: Font: Not Bold

|              |                      |                        |                        |                        |
|--------------|----------------------|------------------------|------------------------|------------------------|
| 348.28±34.86 | 1.01 ±0.01<br>(1.01) | 16.34 ±1.03<br>(17.18) | 67.58 ±4.48<br>(71.32) | 11.15 ±1.32<br>(12.46) |
| 424.55±36.56 | 1.02 ±0.02<br>(1.03) | 17.63 ±1.33<br>(18.19) | 69.73 ±3.83<br>(71.63) | 12.58 ±1.50<br>(13.48) |
| 542.63±28.25 | 1.03 ±0.02<br>(1.05) | 18.54 ±1.02<br>(18.98) | 68.13 ±5.23<br>(70.47) | 13.11 ±1.50<br>(14.13) |
| 657.19±62.36 | 1.03 ±0.04<br>(1.06) | 19.05 ±2.95<br>(19.42) | 59.53 ±7.69<br>(63.19) | 11.77 ±2.24<br>(13.07) |

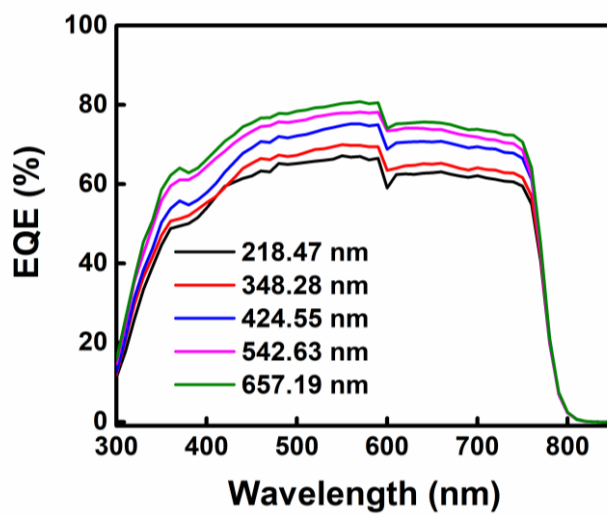

**Figure S4.** EQE spectrum with different thickness of perovskite film by slot-die coating.

Formatted: Font: Not Bold

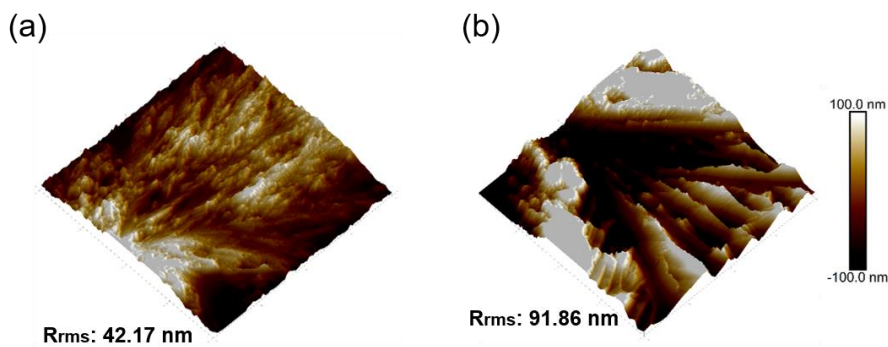

**Figure S5.** Different thickness of slot-die perovskite film (a) 542.63 nm, (b) 657.19 nm.

**Table S5.** Device performance of slot-die coated PSCs with perovskite film fabricated at different substrate temperature.

| Substrate temperature<br>(°C) | $V_{oc}$<br>(V)      | $J_{sc}$<br>(mA/cm <sup>2</sup> ) | FF<br>(%)              | PCE<br>(%)             |
|-------------------------------|----------------------|-----------------------------------|------------------------|------------------------|
| 130                           | 1.03 ±0.05<br>(1.05) | 17.48 ±2.69<br>(18.28)            | 59.82 ±7.34<br>(64.82) | 10.87 ±3.98<br>(12.51) |
| 150                           | 1.04 ±0.01<br>(1.05) | 18.14 ±1.07<br>(18.24)            | 71.22 ±4.08<br>(73.31) | 13.49 ±1.17<br>(14.11) |
| 170                           | 1.05 ±0.02<br>(1.06) | 19.25 ±0.73<br>(19.88)            | 73.05 ±3.65<br>(76.22) | 14.84 ±1.14<br>(16.09) |
| 190                           | 1.03 ±0.02<br>(1.06) | 17.53 ±1.54<br>(18.66)            | 60.71 ±5.17<br>(66.54) | 11.06 ±1.88<br>(13.16) |

Formatted: Font: Not Bold

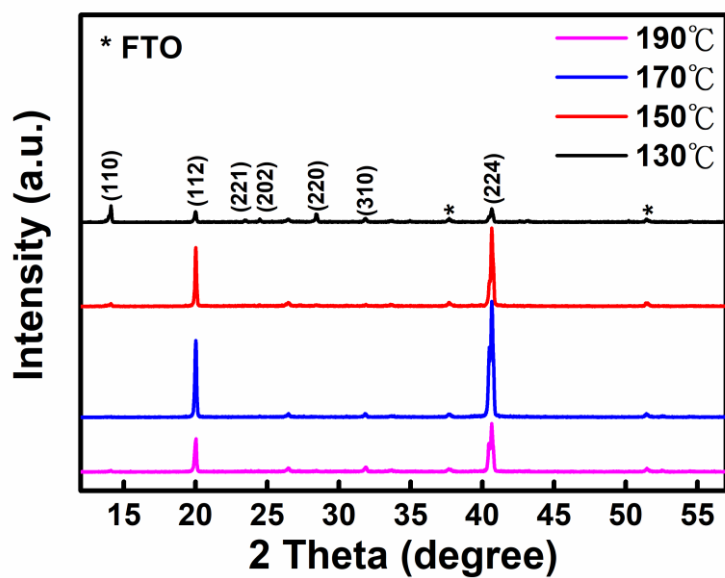

**Figure S6.** XRD patterns of perovskite films fabricated at different substrate temperature.

**Table S6.** Device performance of slot-die coated PSCs using PC<sub>61</sub>BM films fabricated by different solvent compared with spin coated PSCs.

| Process       | PCBM solvent | V <sub>oc</sub> (V)  | J <sub>sc</sub> (mA/cm <sup>2</sup> ) | FF (%)                 | PCE (%)                |
|---------------|--------------|----------------------|---------------------------------------|------------------------|------------------------|
| Slot-die (SD) | o-xylene     | 1.02 ±0.02<br>(1.06) | 17.31 ±1.16<br>(19.35)                | 64.10 ±4.88<br>(66.65) | 11.41 ±1.24<br>(13.64) |
|               | anisole      | 0.95 ±0.05<br>(1.01) | 17.08 ±1.83<br>(19.25)                | 51.62 ±8.45<br>(63.03) | 8.64 ±2.37<br>(12.36)  |
|               | CB           | 1.02 ±0.01<br>(1.02) | 17.49 ±0.88<br>(18.10)                | 64.50 ±5.10<br>(73.52) | 11.52 ±1.01<br>(13.62) |

Formatted: Font: Not Bold

|              |    |                      |                        |                        |                        |
|--------------|----|----------------------|------------------------|------------------------|------------------------|
| Spin<br>(SP) | CB | 1.03 ±0.02<br>(1.06) | 18.66 ±0.63<br>(19.34) | 71.88 ±3.67<br>(74.72) | 13.86 ±0.92<br>(15.35) |
|--------------|----|----------------------|------------------------|------------------------|------------------------|

Formatted: Font: Not Bold

Formatted: Font: Not Bold

Formatted: Font: Not Bold

Formatted: Font: Not Bold

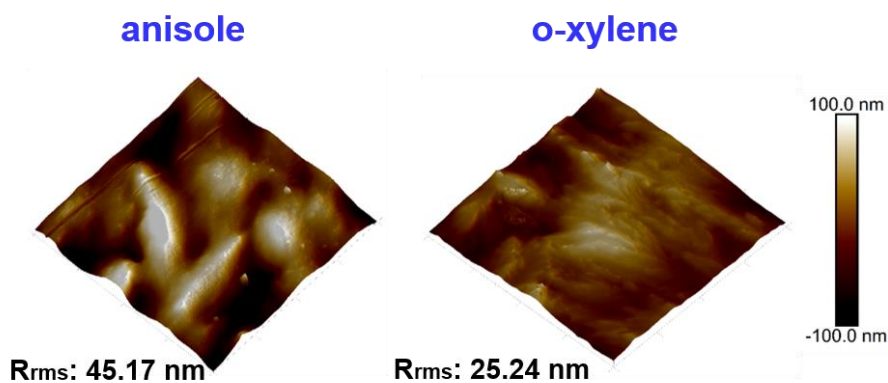

Figure S7. AFM image of PC<sub>61</sub>BM using anisole and o-Xylene solvent.

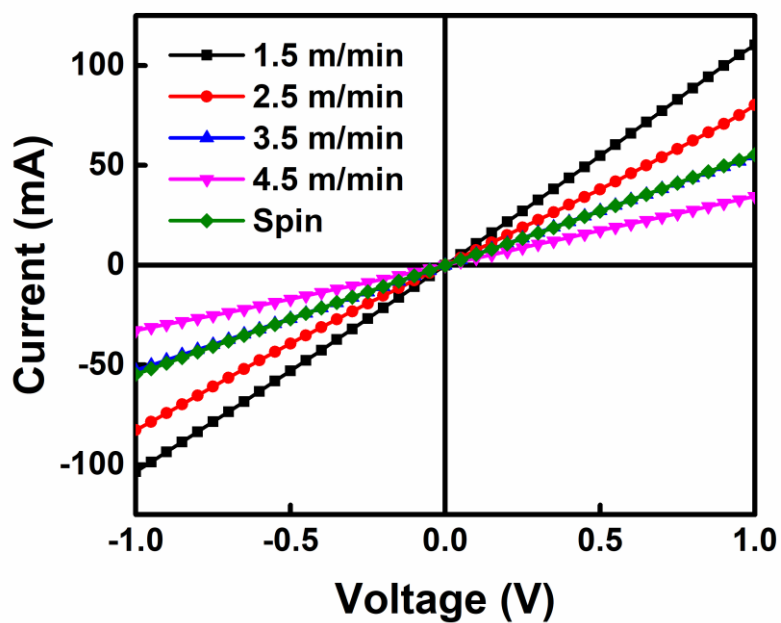



**Figure S8.** The  $I$ - $V$  curve of slot-die coated PC<sub>61</sub>BM film with different moving rate and spin coated PC<sub>61</sub>BM film obtained by linear sweep voltammetry.

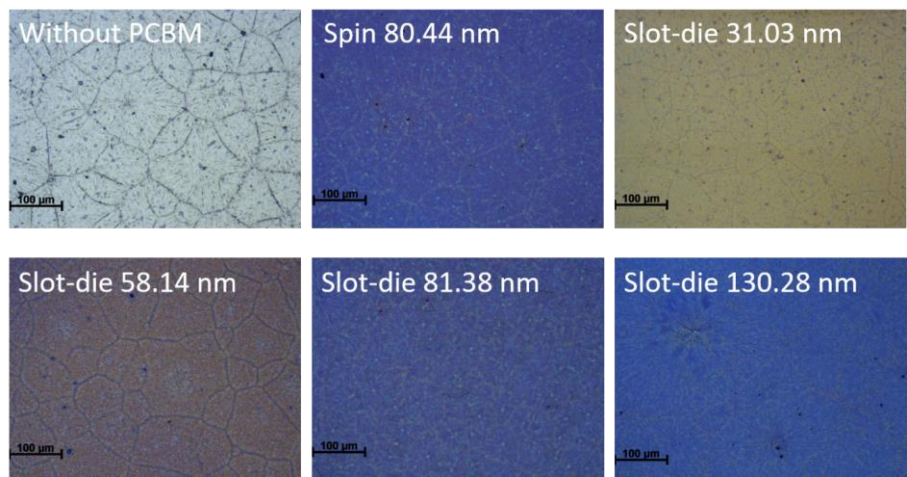

**Figure S9.** OM images of slot-die coated PC<sub>61</sub>BM film with different thickness and spin coated PC<sub>61</sub>BM film.

**Table S7.** Device performance of slot-die coated PSCs with different WF materials compared with spin coated PSCs.

| Process       | Work function layer | V <sub>oc</sub> (V)  | J <sub>sc</sub> (mA/cm <sup>2</sup> ) | FF (%)                 | PCE (%)                |
|---------------|---------------------|----------------------|---------------------------------------|------------------------|------------------------|
| Slot-die (SD) | PEI                 | 0.97 ±0.04<br>(1.03) | 16.51 ±1.86<br>(17.40)                | 51.54 ±5.16<br>(61.14) | 8.38 ±1.75<br>(11.03)  |
|               | TBAOH               | 1.02 ±0.02<br>(1.07) | 16.47 ±0.84<br>(18.69)                | 68.48 ±3.75<br>(69.17) | 11.62 ±0.97<br>(13.85) |
| Spin (SP)     | PEI                 | 1.03 ±0.02<br>(1.06) | 18.69 ±1.18<br>(18.89)                | 67.03 ±5.30<br>(73.35) | 13.03 ±1.73<br>(15.73) |
|               | TBAOH               | 1.02 ±0.01<br>(1.04) | 17.41 ±0.96<br>(18.89)                | 66.20 ±4.15<br>(70.46) | 11.85 ±1.25<br>(13.95) |

Formatted: Font: Not Bold

**Table S8.** Device performance of standard perovskite solar cell and 4 cm<sup>2</sup> substrate area module. The J<sub>sc</sub> and PCE are performed under active area.

| Device                                   | V <sub>oc</sub><br>(V) | J <sub>sc</sub><br>(mA/cm <sup>2</sup> ) | FF<br>(%)              | PCE<br>(%)             |
|------------------------------------------|------------------------|------------------------------------------|------------------------|------------------------|
| Standard cell<br>(0.09 cm <sup>2</sup> ) | 1.03 ±0.02<br>(1.00)   | 18.51 ±0.90<br>(20.34)                   | 62.86 ±4.91<br>(68.03) | 12.03 ±1.08<br>(13.86) |
| Module<br>(0.75 cm <sup>2</sup> )        | 1.99 ±0.06<br>(2.11)   | 8.92 ±0.87<br>(10.10)                    | 56.69 ±2.58<br>(63.30) | 10.03 ±1.35<br>(13.54) |

Formatted: Font: Not Bold

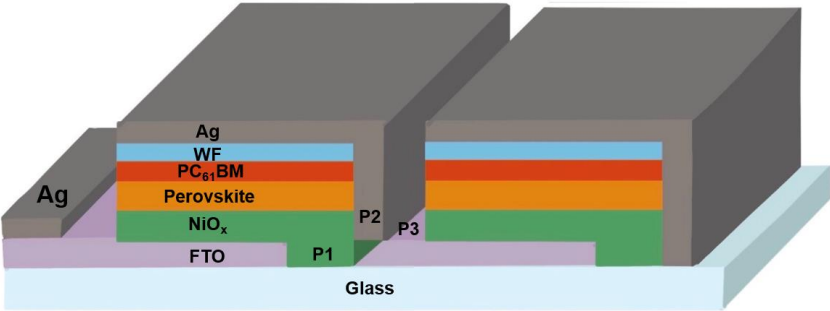

**Figure S10.** The schematic diagram of the module. The line widths of P1, P2, and P3 were 50 μm, 100 μm, and 100 μm, respectively.

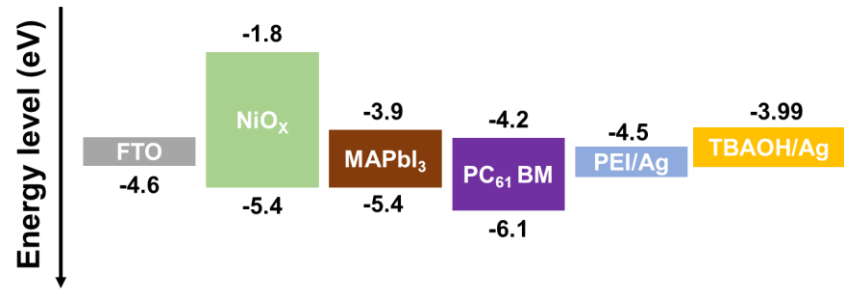

**Figure S11.** The energy band diagram of the perovskite device.

Formatted: Centered, Indent: Left: 0 cm, First line: 0 cm, Don't add space between paragraphs of the same style, Line spacing: 1.5 lines
